# Supplementary material for: ChIP-seq reveals broad roles of SARD1 and CBP60g in regulating plant immunity
Source: PubMed Central journal article supplement (PMC4703862; doi:10.1038/ncomms10159), 2015-12-18
Supplement: ncomms10159-s1.pdf [file ncomms10159-s1.pdf]

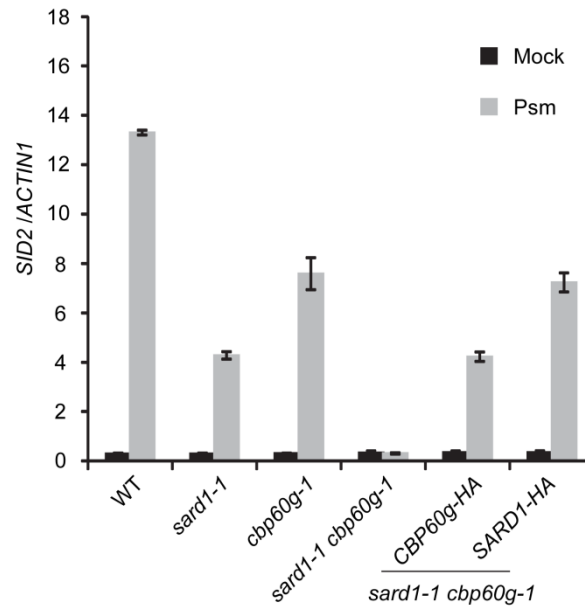

**Supplementary Figure 1. Expression levels of *SID2* in wild type, *sard1-1*, *cbp60g-1*, *sard1-1 cbp60g-1* and representative *SARD1-HA* and *CBP60g-HA* transgenic lines in *sard1-1 cbp60g-1* background.**

Samples were collected from plants of indicated genotypes 24 hours after inoculation with *P.s.m.* ES4326 ( $OD_{600} = 0.001$ ) or 10mM  $MgCl_2$  (mock). *SARD1-HA* and *CBP60g-HA* transgenic lines were generated by transforming *sard1-1 cbp60g-1* with constructs expressing *SARD1-HA* or *CBP60g-HA* under their own promoters. Expression levels of *SID2* were determined by quantitative RT-PCR and normalized with *ACTIN1*. Bars represent means  $\pm$  s.d. (n = 3).

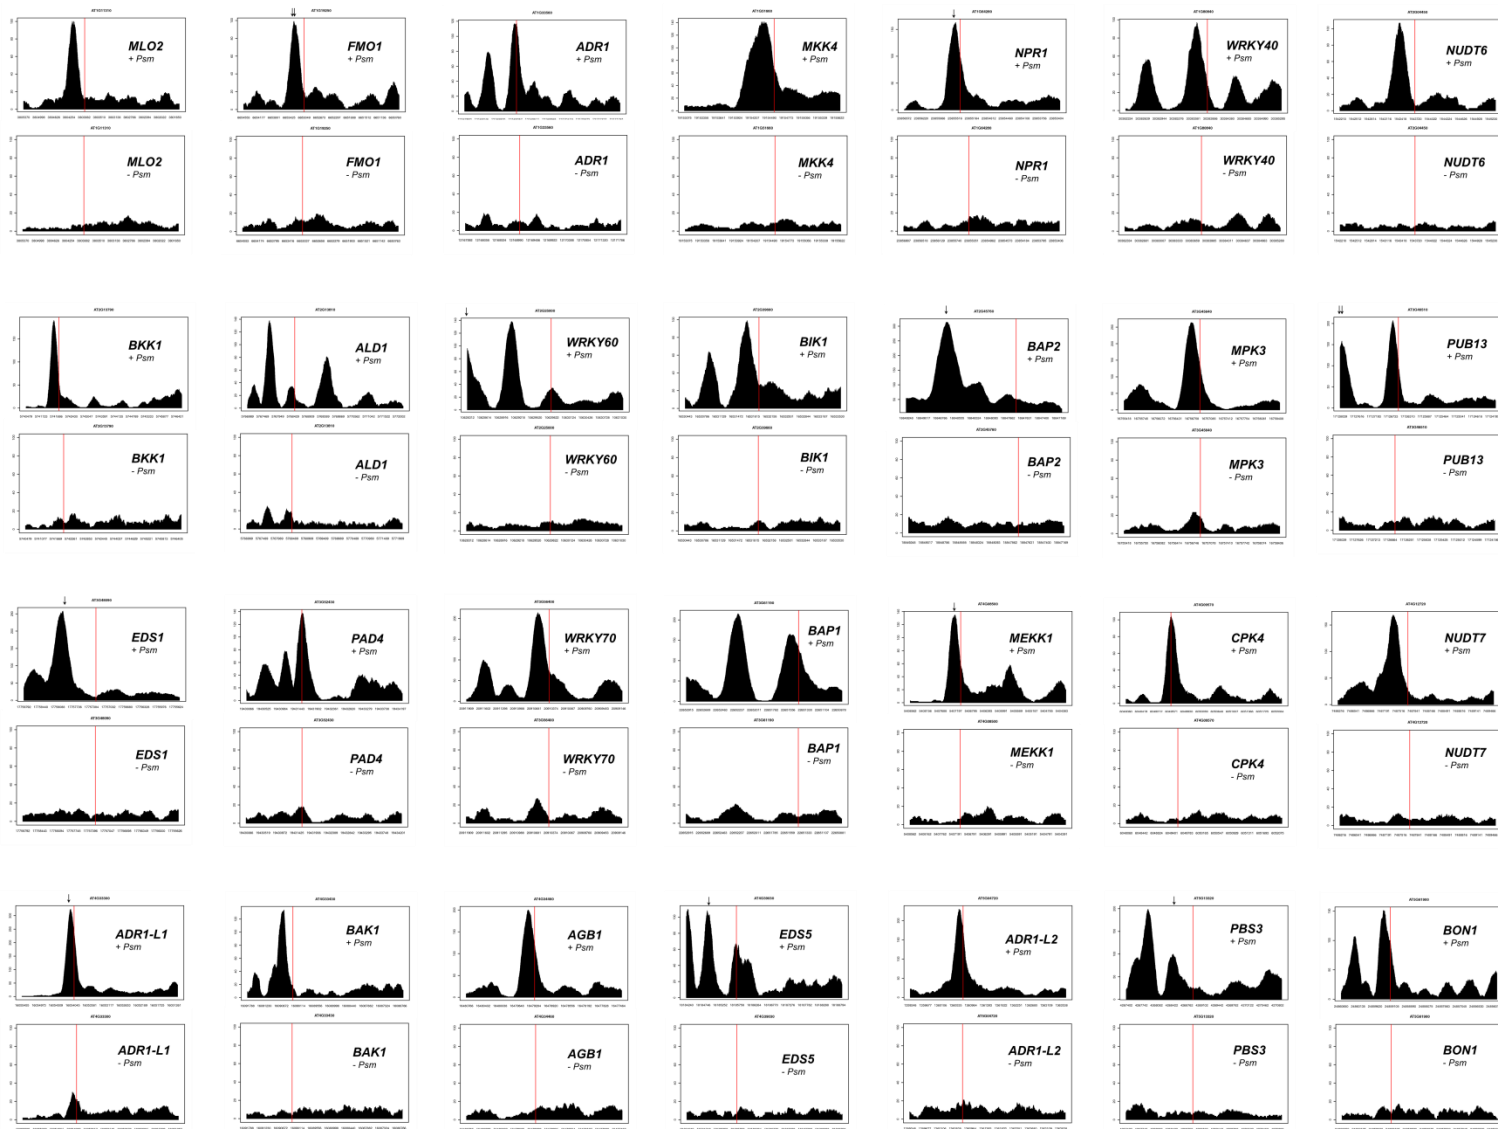

**Supplementary Figure 2. Distribution of sequence reads in the promoter and coding regions of genes in Supplementary Data 1.**

The vertical axis shows the number of sequence reads. The horizontal axis shows the positions on the chromosomes. Positions of the translation start sites are marked with red lines. Positions of GAAATTT motifs that are close to sequence peaks are indicated by arrows. +*Psm*, distribution of sequence reads from SARD1-HA transgenic plants infiltrated with *P.s.m.* ES4326. – *Psm*, distribution of sequence reads from untreated SARD1-HA transgenic plants.

**Supplementary Table 1. Primers used in this study.**

Primers for genotyping

| mutant          | primer name   | primer sequence (5'-->3') |
|-----------------|---------------|---------------------------|
| <i>sard1-1</i>  | SALK_138476-F | CTTCAGTGTCGGAGTAGTCG      |
|                 | SALK_138476-R | CAAGACCTCTCTAACCTAAC      |
| <i>cbp60g-1</i> | SALK_023199-F | TGTTTCGGTGGACTTGTGAC      |
|                 | SALK_023199-R | TAAATCCCTCAACGGTCCAG      |
| <i>snc2-1D</i>  | snc2-1D-F     | TCATCCATTCCAGAGCTTAC      |
|                 | snc2-1D-mutR  | AACACAAGTGAAGAAAGTgT      |
|                 | snc2-1D-WTR   | AACACAAGTGAAGAAAGTgC      |
| <i>npr1-1</i>   | npr1-1-WT-F1  | GAGGGGATATACGGTGCTaC      |
|                 | npr1-1-mut-F2 | GAGGGGATATACGGTGCTaT      |
|                 | npr1-1-R1     | AGCAGCGTCATCTTCAATTC      |

Primers for real time RT-PCR, which were designed to amplify 130- to 300-bp DNA fragments.

| Gene ID   | primer name  | primer sequence (5'-->3') |
|-----------|--------------|---------------------------|
| AT2G37620 | ACTIN1-F     | CGATGAAGCTCAATCCAAACGA    |
|           | ACTIN1-R     | CAGAGTCGAGCACAATACCG      |
| AT2G14610 | PR1 F-2      | AGGCAACTGCAGACTCATAC      |
|           | PR1 R-2      | TTGTTACACCTCACTTTGGC      |
| AT3G57260 | PR2-A        | GCTTCCTTCTCAACCACACAGC    |
|           | PR2-B        | CGTTGATGTACCGGAATCTGAC    |
| AT1G74710 | SID2-F101-RT | GTCGTTTCGGTTACAGGTTCC     |
|           | SID2-R102-RT | ATTAAACTCAACCTGAGGGAC     |
| AT3G56400 | WRKY70-RT-FP | GCCAAATCCCAAGAAGTTAC      |
|           | WRKY70-RT-RP | CTTGTGATCTTCGGAATCCAT     |
| AT4G39030 | EDS5-F101-RT | GCCAAACAGGACAAGAAAGAAG    |
|           | EDS5-R102-RT | GCCGAAACAATCTGTGAAGC      |
| AT1G64280 | NPR1-F101-RT | TTACTCTCTATCAGAGGCAC      |
|           | NPR1-R102-RT | AAGCACCGTATATCCCCTCG      |
| AT1G19250 | FMO1-F101-RT | GGAGATATTCAGTGGCATGC      |
|           | FMO1-R102-RT | TTTGGTTAGGCCTATCATGG      |

|           |              |                           |
|-----------|--------------|---------------------------|
| AT2G13810 | ALD1-F101-RT | TTCCAAGGCTAGTTTGGAC       |
|           | ALD1-R102-RT | GCCTAAGAGTAGCTGAAGACG     |
| AT5G13320 | PBS3-F101-RT | CTAAGTTCTGGAACCTCTGG      |
|           | PBS3-R102-RT | CATGACTGAAGCAAAGATGG      |
| AT3G48090 | EDS1-F1-RT   | GATTATTCAGGTGATCGAGC      |
|           | EDS1-R2-RT   | AATCTGCGGTATCGAGTTGC      |
| AT3G52430 | PAD4-F101    | CTCTTTCTTCAGTTAAAGATCAAGG |
|           | PAD4-R102    | TAGTGTCCGTACCTCTGATG      |
| AT1G33560 | ADR1-RT-FP   | CTTCATACAGGGGAAATGGA      |
|           | ADR1-RT-RP   | CAGGAGACATGCCATTGTTG      |
| AT4G33300 | ADR1-L1-RTF  | GCTATATGCTTGCCCTGAGC      |
|           | ADR1-L1-RTR  | CAGCAGAGCTCGGTCTATCC      |
| AT5G04720 | ADR1-L2-RTF  | TTGAAGCTGCGGAAAAATCT      |
|           | ADR1-L2-RTR  | GAGCAAGAACGAAGTTTGCAC     |
| AT4G33430 | BAK1-4F      | GGCCACTAAAGTACCATCAG      |
|           | BAK1-RT-RP   | TCACCTGCAGGGAGTAATAG      |
| AT2G13790 | BKK1-RT-FP   | ACTCGACTGGGTGAAAGAGG      |
|           | BKK1-RT-RP   | TTTGCCATTCTCCCATCTC       |
| AT4G34460 | AGB1-TDNA-F  | CTGGACATACTGCTGATGTAC     |
|           | AGB1-2479-R  | ACAGGTCCGTTCTCACCATC      |
| AT2G39660 | BIK1-RT-F    | ACTTTGGACTAGCTAGAGAC      |
|           | BIK1-RT-R    | TTCTTCAGGTAGGTACTGTG      |
| AT4G08500 | MEKK1-RT-FP  | TTTGATTGGCAAAGGTTTC       |
|           | MEKK1-RT-RP  | TCAGAGTAGGGGATCTGACCA     |
| AT1G51660 | MKK4-RT-FP   | AGCCAGAACAGGTCTCCTCA      |
|           | MKK4-RT-RP   | GAGACCCTCCATGATTAGCAA     |
| AT3G45640 | MPK3-RT-FP   | AAGAATCACTGTTGAACAAGCTC   |
|           | MPK3-RT-RP   | CCGTATGTTGGATTGAGTGC      |
| AT4G09570 | CPK4-RT-FP   | TGGATGCGCGGATATAGA        |
|           | CPK4-RT-RP   | TTGTTGAAGCTCGTCAATGG      |
| AT3G46510 | PUB13-RTF    | CATCAGGGCAGACATACGAA      |
|           | PUB13-RTR    | TAAACTGCTCGGAGGCTTTG      |
| AT1G80840 | WRKY40-RT-FP | TGACACTACCCTCGTTGTGA      |

|           |              |                          |
|-----------|--------------|--------------------------|
|           | WRKY40-RT-RP | AACACGGACTGATCCTCCAC     |
| AT2G25000 | WRKY60-RT-FP | CAAGAAGAAGGTGCAACGAA     |
|           | WRKY60-RT-RP | TGGTCAACGAAGAAGCCATT     |
| AT2G04450 | NUDT6-105F   | TTAGCTGCTAAGTGGATGCC     |
|           | NUDT6-105R   | TGATCGGTGTTGCAGTAAAG     |
| AT4G12720 | NUDT7-RT-FP  | CTTGCAAGCTAAGTGGATGC     |
|           | NUDT7-RT-RP  | GCGATACTTTAAGGCGCTTG     |
| AT1G11310 | MLO2-RTF     | TTAGACTTGTAGTTGGAGCTGTTG |
|           | MLO2-RTR     | GTGTTGGATCCCGAGTGTCT     |
| AT5G61900 | BON1-RT-FP   | AGAGATGGAGATACTAGACG     |
|           | BON1-RT-RP   | CGAGACGAGATCATTGATGG     |
| AT3G61190 | BAP1-RT-FP   | GAACAGGTTCTGGGCATGAT     |
|           | BAP1-RT-RP   | TAATCTCGGCCTCCACAAAC     |
| AT2G45760 | BAP2-RT-F    | CCGTTGATACGCACACCAAA     |
|           | BAP2-RT-R    | GGTGGCTCCGGTGGATTATG     |

Primers for ChIP-PCR, which were designed to amplify 130- to 300-bp DNA fragments.

| Gene ID   | primer name    | primer sequence (5'-->3') |
|-----------|----------------|---------------------------|
| AT2G37620 | ACT1-proF      | CCGATTTGATGGAGTCTGGT      |
|           | ACT1-proR      | CTTCGGCTCACCTTGTTTTTC     |
| AT3G56400 | WRKY70-P-FP    | AAGCAAAGAAATGGGTGGA       |
|           | WRKY70-P-RP    | TTTCCTCTTGGTGTGGTTTG      |
| AT4G39030 | EDS5-P3-FP     | GAGTAGCGTGTGGCAGAAG       |
|           | EDS5-P3-RP     | CAATGGCAACAAAAGTCACC      |
| AT1G64280 | NPR1-P1-FP     | AATGTAAACCGTGGGACGAG      |
|           | NPR1-P1-RP     | TAAGAATCGGCGAATCCATC      |
| AT1G19250 | FMO1-proF2     | GCTGGTGTAGCGGATTAGC       |
|           | FMO1-proR2     | TGGAAAGTCGGAGAACTCGT      |
| AT2G13810 | ALD1-pro #34Fi | TGAATGTTAGTCCTAGTCCC      |
|           | ALD1-pro #34Ri | GTGACGCTACAACAACCTTTC     |
| AT5G13320 | PBS3-ProF2     | TTTGCAGAAGTTCCTTGTGG      |
|           | PBS3-ProR2     | TGTGACGAATTGTTGAGCAAG     |
| AT3G48090 | EDS1-pro #37Fi | GATTATCCGGTTTACTTTCC      |

|           |                |                        |
|-----------|----------------|------------------------|
|           | EDS1-pro #37Ri | GATTTTCGCAGTAACTCAATGA |
| AT3G52430 | PAD4-P1-FP     | TGGACCTACCTTTCACAGCA   |
|           | PAD4-P1-RP     | ACCGAAGCTTGCAACTCACT   |
| AT3G20600 | NDR1-proF      | TGTTATGGGACATCCCTCGT   |
|           | NDR1-proR      | CAGTAGGACACACACGCACA   |
| AT1G33560 | ADR1-Pro-FP    | CTTCGTCTTCTTCGCTATTTTC |
|           | ADR1-Pro-RP    | AAGAGTTGCGTCGTGATGTC   |
| AT4G33300 | ADR1-L1-ProF   | TCGAGCTCCATTGACTTGACT  |
|           | ADR1-L1-ProR   | ATCGTCGGTCGAATGCTATC   |
| AT5G04720 | ADR1-L2-proF   | TGGTCCACACTTGCATCATT   |
|           | ADR1-L2-proR   | AGCTTCGTTGCAGTCACCTT   |
| AT4G33430 | BAK1-P-FP      | TCTCGGCGTTCCTTCTAATC   |
|           | BAK1-P-RP      | AAGCTACCACCCACACAAGG   |
| AT2G13790 | BKK1-Pro-FP    | TCCTTCTTTGGCTCAAATGG   |
|           | BKK1-Pro-RP    | CGTTGACGAAGACAAACGAA   |
| AT4G34460 | AGB1-P-FP      | GAGCCGTGTTTGTGTCTTGA   |
|           | AGB1-P-RP      | AAAAGGGGGAAACTTTGTGG   |
| AT2G39660 | BIK1-Pro-FP    | CCAAACCCAAAACCTCCCTTC  |
|           | BIK1-Pro-RP    | TCAGCTGCTTGAGCTGAAAA   |
| AT4G08500 | MEKK1-Pro-FP   | ATCTCTCTCTCGCCGTCAG    |
|           | MEKK1-Pro-RP   | ACCAGCTCAAATCCATACGC   |
| AT1G51660 | MKK4-Pro-FP    | TTAAGCCTGCCACAAACAAA   |
|           | MKK4-Pro-RP    | TCTCATCGCTTTTGGAAATCA  |
| AT3G45640 | MPK3-P-FP      | AACGAACAGAAACCGTCGAT   |
|           | MPK3-P-RP      | TGGTTGCTTTGAGGTTTGAA   |
| AT4G09570 | CPK4-Pro-FP    | TCTTCCTCCTCCTCCTTTGA   |
|           | CPK4-Pro-RP    | CTAGCTTTTTGCCGAGGAGA   |
| AT3G46510 | PUB13-proF     | TGGAGTCTCAATCGGGAAAG   |
|           | PUB13-proR     | GAAATCGCAGCAATCTCGTT   |
| AT1G80840 | WRKY40-Pro-FP  | CCGATAGAAGCCGAGTTGAG   |
|           | WRKY40-Pro-FP  | TGGTGGGATTGTTGAAGAGA   |
| AT2G25000 | WRKY60-Pro-FP  | GACATCCGCCGAAATTGTT    |
|           | WRKY60-Pro-RP  | AATTTGTTGGCTTGCATCGT   |

|           |             |                          |
|-----------|-------------|--------------------------|
| AT2G04450 | NUDT6-P-FP  | TCCGTTGACAGAGCAAATG      |
|           | NUDT6-P-RP  | CCAAGAGGGCGACTTAAAGA     |
| AT4G12720 | NUDT7-proF2 | TAAACAAAGGGCACGGAAAC     |
|           | NUDT7-proR2 | CCTGTGTGTACCTTGGAGAGAA   |
| AT1G11310 | MLO2-proF   | CTCTCGTTGCGGGTCTTATC     |
|           | MLO2-proR   | CGAAGAGAAAGAGAGACACAGTCA |
| AT5G61900 | BON1-Pro-FP | TGGGTCCCATTTACTGCTCT     |
|           | BON1-Pro-RP | GGAGCAACAATCCCCATAA      |
| AT3G61190 | BAP1-P-FP   | TATCACGCTGCTGGATTCAA     |
|           | BAP1-P-RP   | TCTCGGAATCACGATGTTA      |
| AT2G45760 | BAP2-P-FP   | GCCGTATCAACGACTCCATT     |
|           | BAP2-P-RP   | ATACGCATGCATTCACGAAA     |
